# Supplementary material for: Consumption of high-dose vitamin C (1250 mg per day) enhances functional and structural properties of serum lipoprotein to improve anti-oxidant, anti-atherosclerotic, and anti-aging effects via regulation of anti-inflammatory microRNA
Source: Royal Society of Chemistry journal article supplement (doi:10.1039/c5fo00738k), 2015-01-01
Supplement: c5fo00738k1.pdf [file c5fo00738k1.pdf]

**Suppl. Table 1.** Change of lipid and protein profiles in lipoproteins during vitamin C consumption for 8 weeks.

|                  |         | NS-F (n=14) |          |          | NS-M (n=20) |          |          | S-M (n=12)   |           |          |
|------------------|---------|-------------|----------|----------|-------------|----------|----------|--------------|-----------|----------|
|                  |         | 0w          | 4w       | 8w       | 0w          | 4w       | 8w       | 0w           | 4w        | 8w       |
| LDL              | TC (μg) | 2951±120    | 2829±64  | 2956±80  | 3809±101    | 3538±109 | 4053±142 | 2764±113     | 2796±119  | 2897±81  |
|                  | TG (μg) | 1392±21     | 1367±42  | 1555±61  | 2269±40     | 2384±17  | 2284±35  | 2378±15      | 2461±19   | 2456±17  |
|                  | TP (μg) | 1849±185    | 2020±360 | 2312±389 | 2431±269    | 2455±14  | 2325±753 | 1885±0       | 1946±101  | 2008±40* |
| HDL <sub>2</sub> | TC (μg) | 556±11      | 558±15   | 712±10** | 520±13      | 521±2    | 536±6    | 283±1        | 366±12*   | 371±5**  |
|                  | TG (μg) | 99±0        | 92±9     | 83±5     | 66±4        | 75±9     | 66±0     | 62±3         | 82±4      | 58±8     |
|                  | TP (μg) | 949±17      | 939±50   | 1062±11* | 781±38      | 737±17   | 837±81   | 555±40       | 640±23    | 660±17*  |
| HDL <sub>3</sub> | TC (μg) | 508±5       | 553±17   | 569±13*  | 788±9       | 910±20*  | 921±16*  | 397±6        | 428±9*    | 416±4*   |
|                  | TG (μg) | 74±5        | 56±4*    | 54±3*    | 75±6        | 63±10    | 46±6**   | 78±7         | 44±4**    | 52±2**   |
|                  | TP (μg) | 2398±105    | 1995±84* | 2326±189 | 2679±274    | 3111±294 | 2947±97  | 1688±21<br>0 | 3060±329* | 1756±63  |

TC, total cholesterol; TG, triglyceride; TP, total protein; NS-F, non-smoker female; NS-M, non-smoker male; S-M, smoker male;

\* $p < 0.05$ ; \*\*,  $p < 0.01$  versus 0-week in each group
