# Supplementary material for: Consumption of high-dose vitamin C (1250 mg per day) enhances functional and structural properties of serum lipoprotein to improve anti-oxidant, anti-atherosclerotic, and anti-aging effects via regulation of anti-inflammatory microRNA
Source: Royal Society of Chemistry journal article supplement (doi:10.1039/c5fo00738k), 2015-01-01
Supplement: c5fo00738k2.pdf [file c5fo00738k2.pdf]

# Suppl Fig. 1

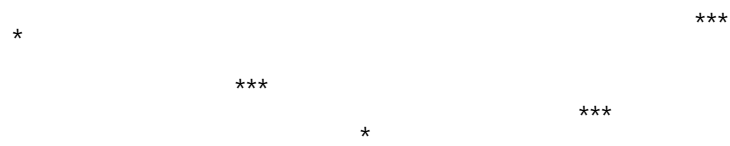

Quantification of oxidized species in LDL, HDL<sub>2</sub>, and HDL<sub>3</sub> using TBARS method. \*,  $p < 0.05$ ; \*\*,  $p < 0.01$ ; \*\*\*,  $p < 0.001$  vs week 0 in each subject.

# Suppl. Fig. 2A

PBS

oxLDL

oxLDL+NS-F HDL<sub>2</sub> 0w

oxLDL+NS-F HDL<sub>2</sub> 8w

oxLDL+NS-F HDL<sub>3</sub> 0w

oxLDL+NS-F HDL<sub>3</sub> 8w

oxLDL+NS-M HDL<sub>2</sub> 0w

oxLDL+NS-M HDL<sub>2</sub> 8w

oxLDL+NS-M HDL<sub>3</sub> 0w

oxLDL+NS-M HDL<sub>3</sub> 8w

oxLDL+S-M HDL<sub>2</sub> 0w

oxLDL+S-M HDL<sub>2</sub> 8w

oxLDL+S-M HDL<sub>3</sub> 0w

oxLDL+S-M HDL<sub>3</sub> 8w

# Suppl. Fig. 2B

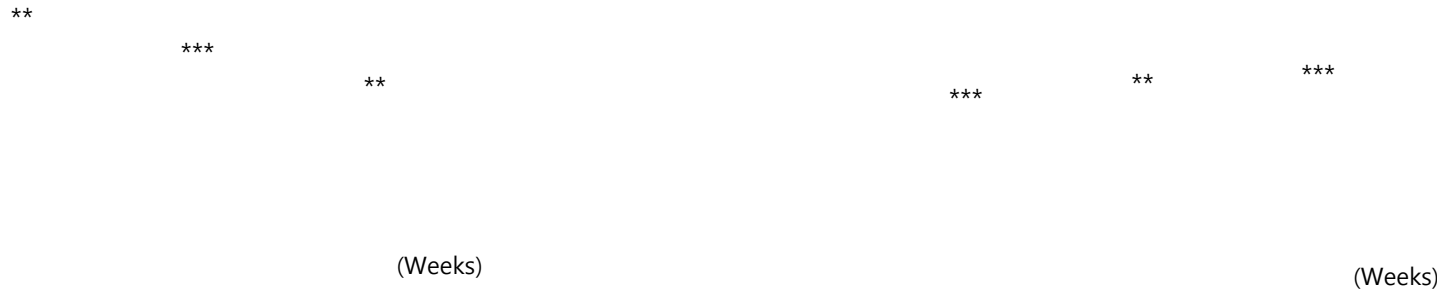

Inhibition of oxLDL uptake by HDL<sub>2</sub> and HDL<sub>3</sub> purified from each subject after 0 and 8 weeks of Vit C consumption. Extent of oxLDL phagocytosis are visualized by oil-red O staining (A) and quantified by image analysis software (B).

NS-F HDL<sub>2</sub> 0w

NS-F HDL<sub>2</sub> 8w

NS-F HDL<sub>3</sub> 0w

NS-F HDL<sub>3</sub> 8w

NS-M HDL<sub>2</sub> 0w

NS-M HDL<sub>2</sub> 8w

NS-M HDL<sub>3</sub> 0w

NS-M HDL<sub>3</sub> 8w

S-M HDL<sub>2</sub> 0w

S-M HDL<sub>2</sub> 8w

S-M HDL<sub>3</sub> 0w

S-M HDL<sub>3</sub> 8w

# Suppl. Fig. 3B

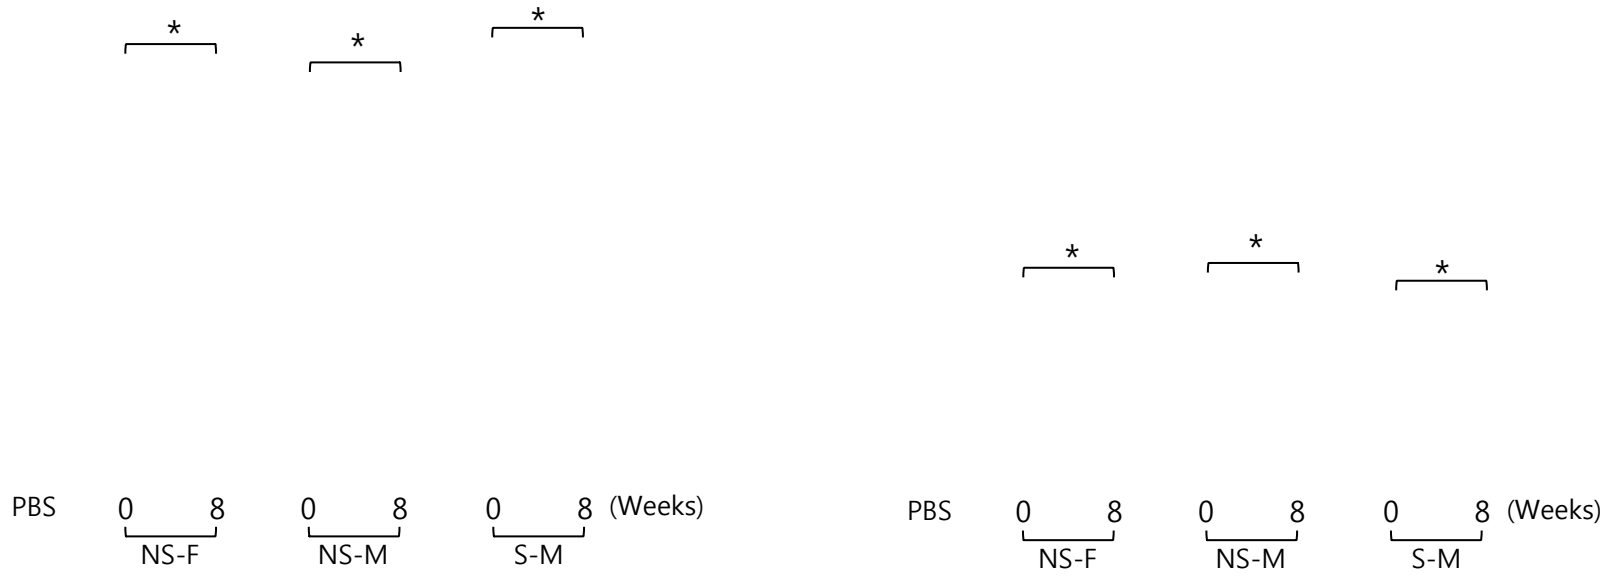

Inhibition of cellular senescence by HDL<sub>2</sub> and HDL<sub>3</sub> purified from each group after consumption of Vit C. Representative image of SA-β-gal-positive HDF cells, as visualized by blue staining.

Percentage of SA-β-gal-positive cells per 7.4 mm<sup>2</sup> of cell culture area. Data are shown as the mean±SD of three independent experiments performed in duplicate. \*, *p*<0.05 vs week 0 in each group.

# Suppl. Fig. 4

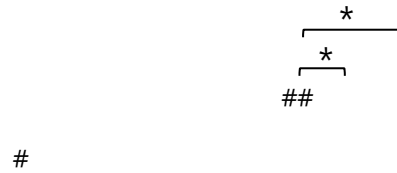

Change in melanin content of facial skin after consumption of Vit C. \*,  $p < 0.05$  vs week 0 in each group. #,  $p < 0.05$  vs NS-F group; ##,  $p < 0.01$  vs NS-F group.
